# Supplementary material
Source: Research Square preprint supplement (doi:10.21203/rs.3.rs-9339364/v1)
Supplement: Supplementary file 3 [file 89a9ad099f3687da361f93a3.docx]

**Supplementary Table S1. Baseline Characteristics After Inverse Probability of Treatment Weighting (IPTW)**

| **Characteristic** | **Overall** (N = 710)1 | **National Free** (N = 495)1 | **Resident** (N = 133)1 | **Urban Employee** (N = 82)1 | **p-value**2 |
| --- | --- | --- | --- | --- | --- |
| Age (Years), Mean (SD) | 45 (13) | 45 (12) | 44 (13) | 47 (14) | 0.79 |
| Gender, n (unweighted) (%) |  |  |  |  | 0.53 |
| Male | 426 (63%) | 280 (60%) | 86 (60%) | 60 (67%) |  |
| Female | 284 (37%) | 215 (40%) | 47 (40%) | 22 (33%) |  |
| Marital Status, n (unweighted) (%) |  |  |  |  | 0.82 |
| Married/Cohabiting | 351 (50%) | 255 (49%) | 65 (49%) | 31 (53%) |  |
| Unmarried/Divorced/Widowed | 359 (50%) | 240 (51%) | 68 (51%) | 51 (47%) |  |
| Education Level, n (unweighted) (%) |  |  |  |  | 0.91 |
| <= High School | 482 (68%) | 351 (68%) | 107 (69%) | 24 (67%) |  |
| >= College | 228 (32%) | 144 (32%) | 26 (31%) | 58 (33%) |  |
| Employment Status, n (unweighted) (%) |  |  |  |  | 0.74 |
| Employed | 397 (58%) | 266 (56%) | 67 (57%) | 64 (61%) |  |
| Unemployed/Retired/Other | 313 (42%) | 229 (44%) | 66 (43%) | 18 (39%) |  |
| Residence, n (unweighted) (%) |  |  |  |  | 0.85 |
| Urban | 557 (79%) | 382 (79%) | 96 (78%) | 79 (81%) |  |
| Rural | 153 (21%) | 113 (21%) | 37 (22%) | 3 (19%) |  |
| CD4 Cell Count, Mean (SD) | 657 (338) | 627 (276) | 648 (351) | 697 (380) | 0.84 |
| 1Data are presented as unweighted sample sizes (n) and weighted percentages (%). P-values are derived from the weighted pseudo-population to confirm covariate balance. | | | | | |
| 2Design-based KruskalWallis test; Pearson's X^2: Rao & Scott adjustment | | | | | |
