# Supplementary material
Source: Research Square preprint supplement (doi:10.21203/rs.3.rs-9339364/v1)

# Covariate Balance Before and After IPTW

Max across treatment pairs

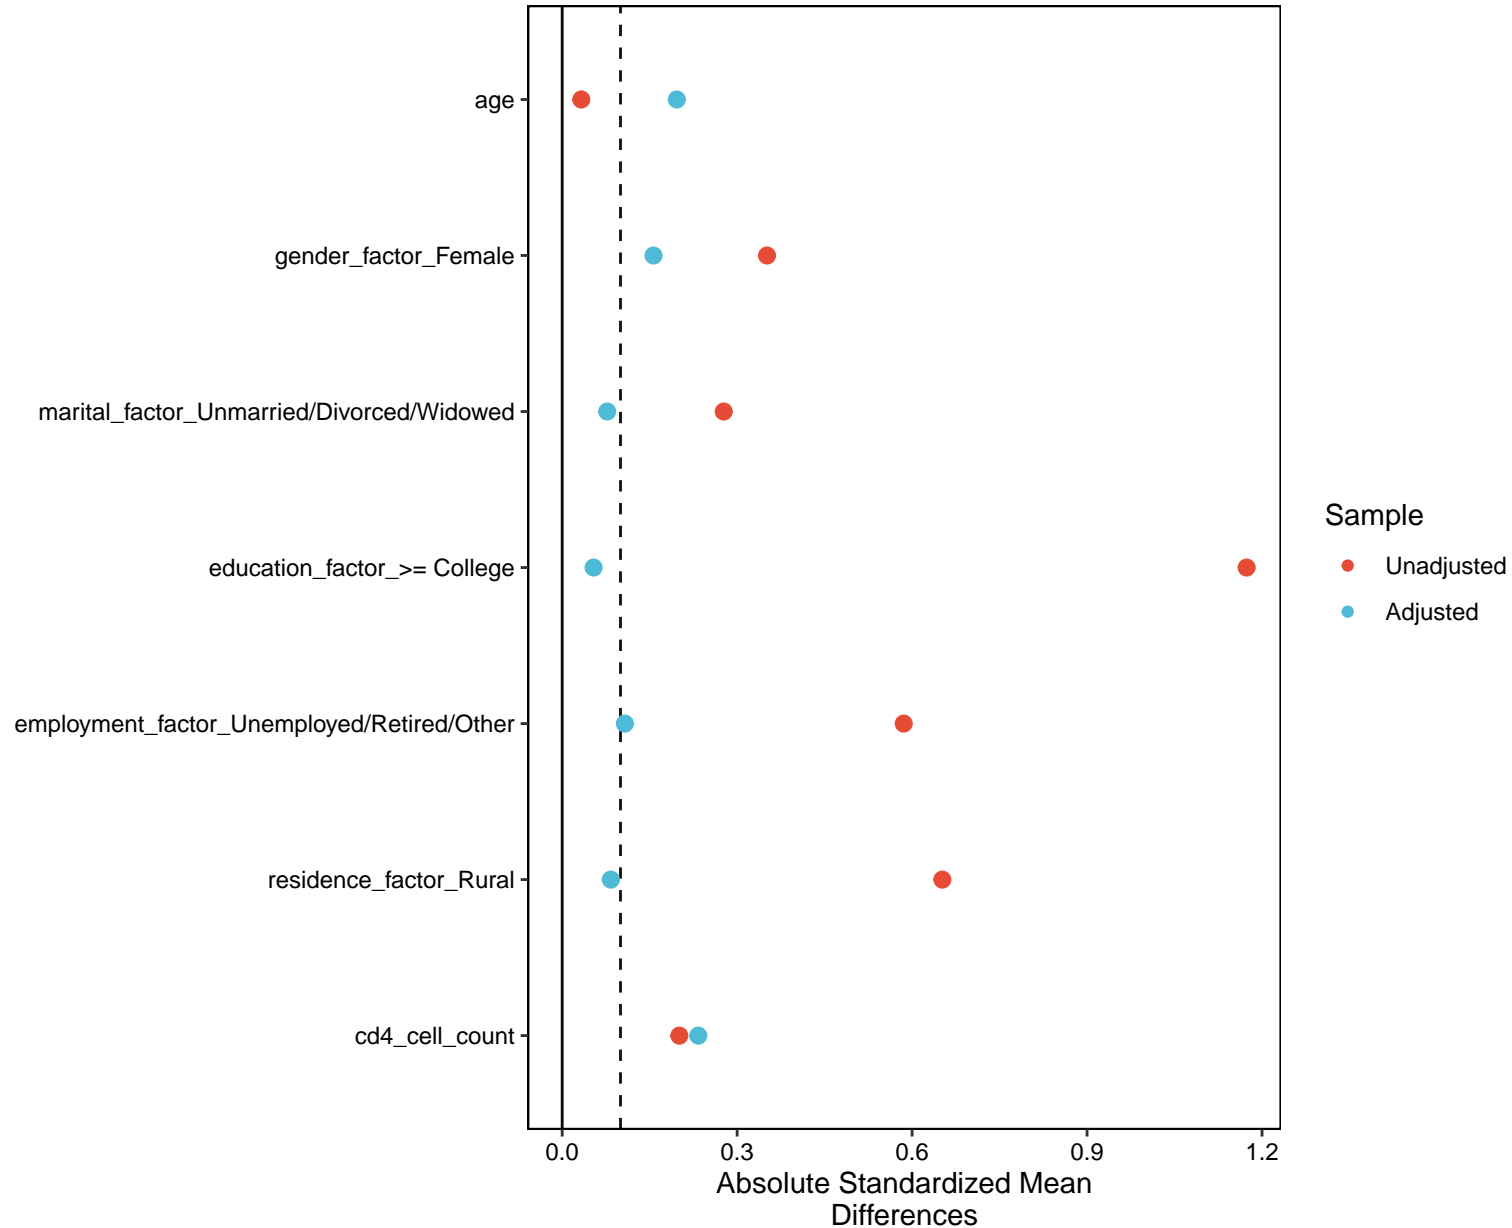

Supplement: Supplementary file 2 [file 7c4391d20c40a4191f4a0c0d.pdf]
